# Supplementary material for: Molecular tiltation and supramolecular interactions induced uniaxial NTE and biaxial PTE in bis-imidazole-based co-crystals
Source: Royal Society of Chemistry journal article supplement (doi:10.1039/d2nj03717c), 2022-01-01
Supplement: d2nj03717c1.pdf [file d2nj03717c1.pdf]

## Electronic Supplementary Information(ESI)

### Molecular tilting and supramolecular interactions induced uniaxial NTE and biaxial PTE in bis-imidazole based co-crystals

Sunil Kumar,<sup>a</sup>Priyasha<sup>a</sup>and Dinabandhu Das<sup>\*a</sup>

School of Physical Sciences, Jawaharlal Nehru University, New Delhi-110067, India

Email: [jnu.dinu@gmail.com](mailto:jnu.dinu@gmail.com)

#### Table of Content

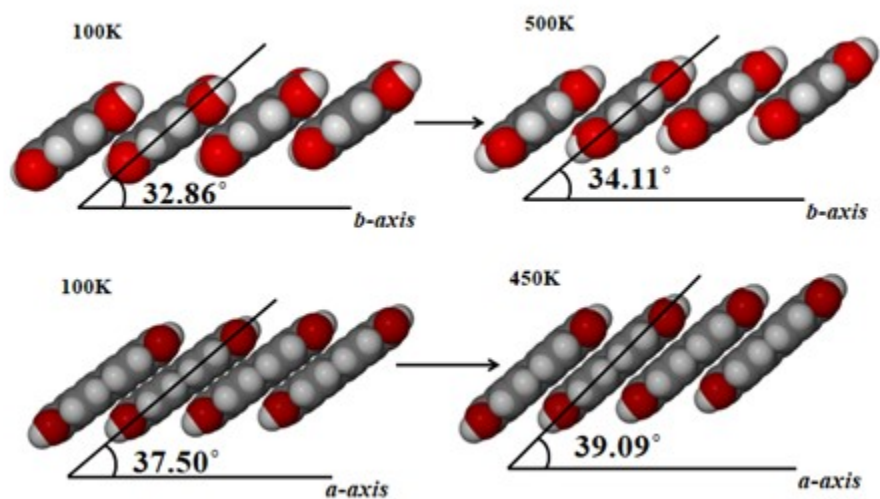

- 1. Experimental section: Synthesis of ligand and co-crystals**
  - Figure S1.**  $^1\text{H}$ -NMR spectra of **BIMB**
  - Figure S2.** FT-IR spectra of **BIMB**
  - Figure S3.** FT-IR spectra of **BIMB-TA**
  - Figure S4.** FT-IR spectra of **BIMB-BPDCA**
- 2. Differential Scanning Calorimetric study**
  - Figure S5.** DSC thermogram of **BIMB-TA**
  - Figure S6.** DSC thermogram of **BIMB-BPDCA**
- 3. Figure S7. Photographs of single crystal of BIMB-TA and BIMB-BPDCA**
- 4. Variable temperature Single Crystal X-ray Diffraction.**
  - Table S1.** Crystallographic data and structure refinement parameters of **BIMB-TA**
  - Table S2.** Crystallographic data and structure refinement parameters of **BIMB-BPDCA**
  - Table S3.** Change of Unit cell parameters of **BIMB-TA** with change of temperature
  - Table S4.** Change of Unit cell parameters of **BIMB-BPDCA** with change of temperature
  - Table S5.** Calculation of Thermal Expansion Coefficient by PASCAL Program
  - Figure S8a** Percent Change in length with temperature of **BIMB-TA** co-crystal
  - Figure S8b.** Percent Change in length with temperature of **BIMB-BPDCA** co-crystal
  - Figure S9.** Change of tilt angle of **TA** molecules in the crystal structure of **BIMB-TA** with increasing temperature.
  - Figure S10.** Tiltation of **TA** molecules along *b*-axis in the crystal structure of **BIMB-TA** at different temperature
  - Figure S11.** **BIMB-TA** co-crystal having C–H $\cdots$ O and C–H $\cdots$  $\pi$  interactions
  - Figure S12.** Change of tilt angle of **BPDCA** molecules in the crystal structure of **BIMB-BPDCA**
  - Figure S13.** Tiltation of **BPDCA** molecule along *a*-axis in the crystal structure of **BIMB-BPDCA** at different temperature.
  - Figure S14.** C–H $\cdots$ O interactions in the crystal structure of **BIMB-BPDCA**
  - Table S6.** Geometrical parameters of hydrogen bond in **BIMB-TA**
  - Table S7.** Geometrical parameters of hydrogen bond in **BIMB-BPDCA**
- 5. Powder X-ray Diffraction**
  - Figure S15.** Powder X-ray Diffractogram of **BIMB-TA**
  - Figure S16.** Powder X-ray Diffractogram of **BIMB-BPDCA**
- 6. Thermal Ellipsoid Plot of asymmetric unit at variable temperatures**
  - Figure S17.** Thermal ellipsoid plot of **BIMB-TA** at different temperature
  - Figure S18.** Thermal ellipsoid plot of **BIMB-BPDCA** at different temperature
- 7. References**

## 1. Experimental Section: Synthesis of the ligand **BIMB** and co-crystals **BIMB-TA** and **BIMB-BPDCA**

All chemicals were of reagent grade and were used without further purification. The ligand [1,4-bis[(2-methylimidazol-1-yl)methyl]benzene] (**BIMB**) was synthesized by slightly modified procedure reported in the literature.<sup>1</sup> In a two neck round bottom flask 1g (14.70mmol) of imidazole was dissolved in 15ml of dry THF solvent. The resulting solution was stirred at room temperature for 1h. Under inert atmosphere 500mg (20 mmol) of NaH was added to the imidazole solution of THF. The resulting suspension was stirred at room temperature for another 6h. THF solution of  $\alpha, \alpha'$ -dichloro-*p*-xylene (700mg, 4 mmol) was added dropwise to the reaction mixture, the resulting solution is further stirred at room temperature for another 5h. The solvent was removed under vacuum and the product was extracted with dichloromethane solvent. Colorless solid was obtained (approximately 850mg) and resulting solid was dissolved in hot water to get the colorless crystals of **BIMB**. Molecular structure of **BIMB** ligand has been characterized by <sup>1</sup>H NMR spectroscopy and IR. This compound was used to synthesize new Organic co-crystals with terephthalic acid (**TA**) and 4,4'-biphenyl dicarboxylic acid (**BPDCA**). Both the co-crystals have been prepared by solvent assisted grinding method. Few drops of methanol solvent were added in the mixture of components taken in 1:1 stoichiometric ratio and grinded in a mortar and pestle.

**BIMB-TA** co-crystal has been prepared by mixing 25mg (104.91mmol) of **BIMB** and 17.42mg (104.91mmol) of **TA**, while **BIMB-BPDCA** co-crystal has been prepared by taking 30mg (125.89mmol) of **BIMB** and 30.49mg (125.89mmol) of **BPDCA**. In both the cases the mixture was grinded by adding few drops of methanol in mortar and pestle. After grinding, the powdered material was dissolved in 10ml of methanol (for **BIMB-TA**) and 15ml of DMF (for **BIMB-BPDCA**) the resulting mixture was mechanically stirred for 15 minutes. The resulting solution is filtered and kept at room temperature for slow evaporation of the solvent. Within a week colorless

block shaped crystals were obtained. The co-crystals were characterized by IR, PXRD and the structures were confirmed by SCXRD.

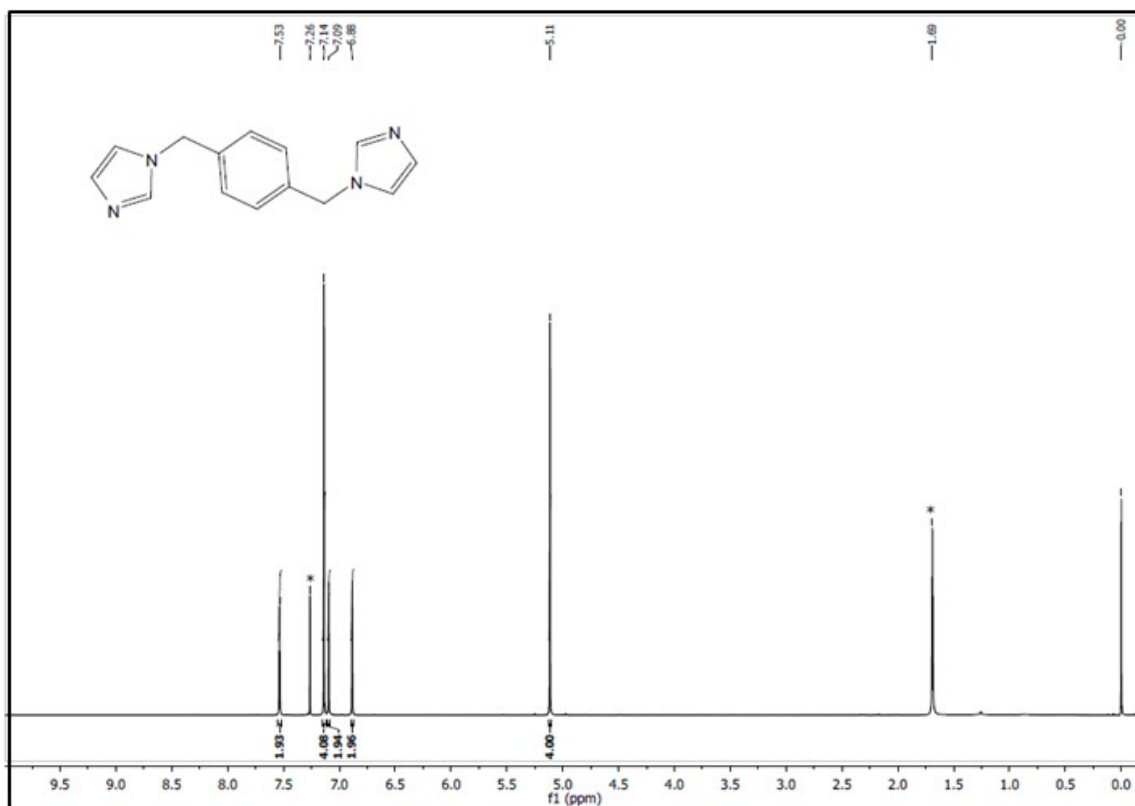

**Figure S1.** <sup>1</sup>H NMR spectrum of **BIMB** in CDCl<sub>3</sub> at RT.

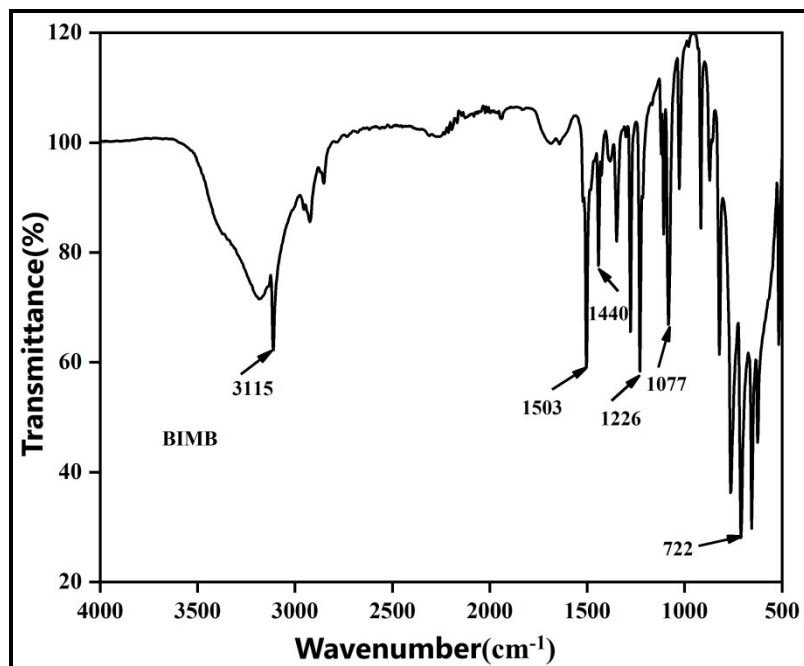

Figure S2. FT-IR spectra of BIMB

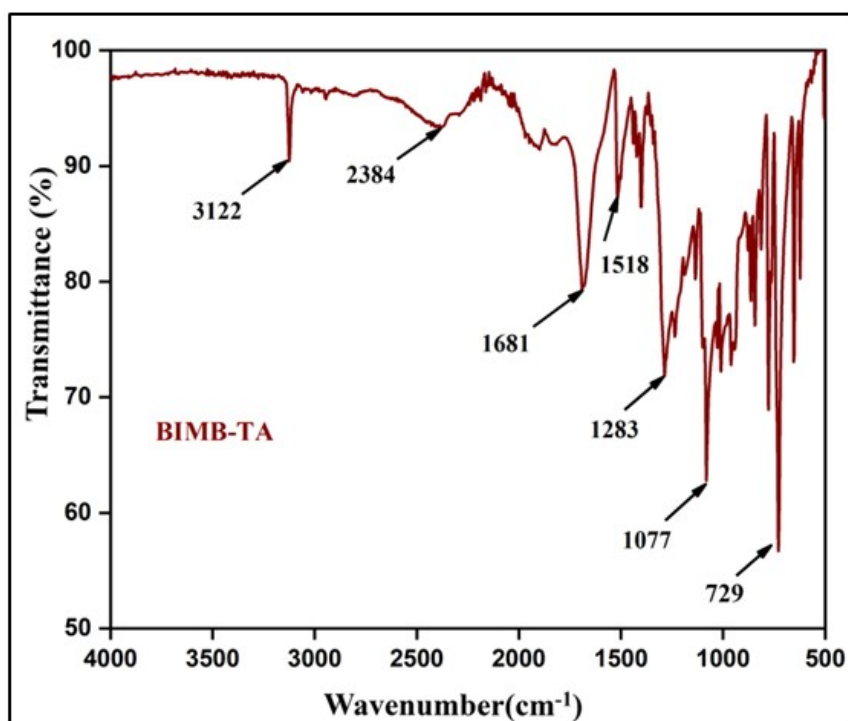

Figure S3. FT-IR spectra of BIMB-TA co-crystal

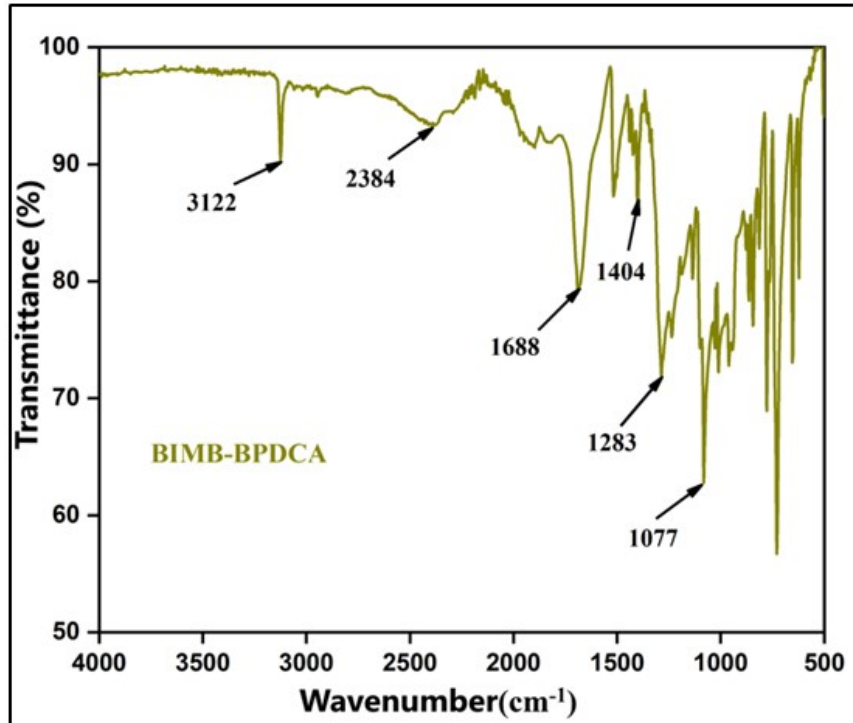

Figure S4. FT-IR spectra of BIMB-BPDCA co-crystal

## 2. Differential Scanning Calorimetry

Differential scanning calorimetric measurements of the co-crystals **BIMB-TA** and **BIMB-BPDCA** has been carried using Mettler-Toledo DSC1 instrument. Approximately 3.5 mg of pure crystalline powder was sealed in aluminium pan and covered with a pierced lid. Samples were heated at the rate of 5°C/min under the flow of N<sub>2</sub> gas with the rate of 20 ml/min from 25 °C to 280°C in case of **BIMB-TA** and 25°C to 300°C for **BIMB-BPDCA**.

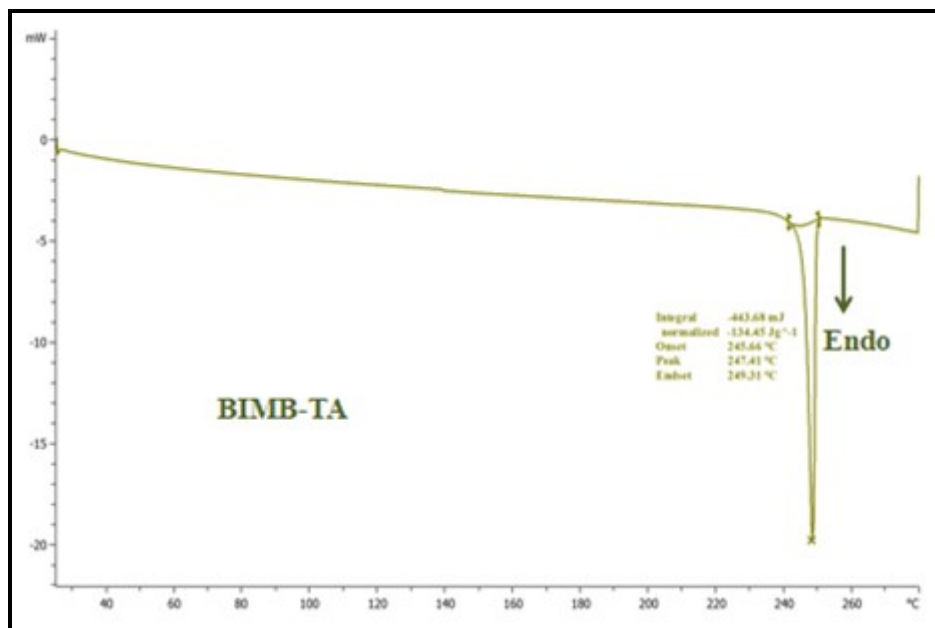

**Figure S5.** DSC thermogram shows melting of **BIMB-TA** at 247.41°C with an onset temperature of 245.66°C.

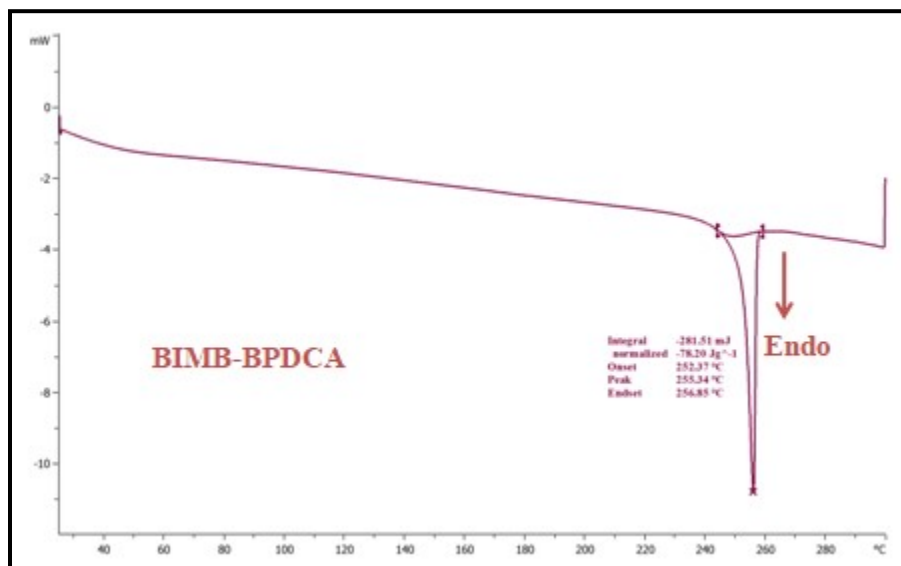

**Figure S6.** DSC thermogram shows melting of **BIMB-BPDCA** at 255.34°C with an onset temperature of 252.37°C.

### 3. Photographs of Single crystals

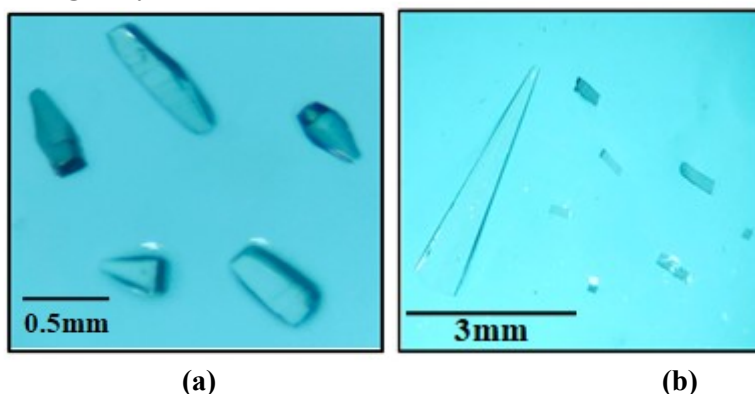

Figure S7. Photograph of single crystals of (a) **BIMB-TA**, (b) **BIMB-BPDCA**

### 4. Variable temperature Single Crystal X-ray Diffraction.

Single-crystal X-ray data of **BIMB-TA** and **BIMB-BPDCA** were collected on Bruker D8 Quest single crystal X-ray diffractometer equipped with a microfocus anode ( $\text{MoK}\alpha$ ) and PHOTON-II detector. A suitable single crystals was mounted on a glass fibre attached with epoxy glue and mounted on a goniometer head for data collection. Variable temperature on the crystal was maintained using an oxford cryostream 800 plus cryostat. Single crystal data was recorded at every 50 K interval in the temperature range of 100K to 500K for **BIMB-TA** and 100K to 450K for **BIMB-BPDCA** co-crystal. Data integration and scaling was done using Bruker suite program.<sup>2</sup> Structures were solved by direct methods using SHELXT-2014/5<sup>3</sup> and refined by full-matrix least-squares on  $F^2$  using SHELXL-2018/3.<sup>4</sup> Acidic protons ( $\text{COOH}$ ) in the molecules of each co-crystals were assigned using difference Fourier map and rest of the hydrogen atoms were fixed in the riding model. All the non-hydrogen atoms were refined anisotropically. Crystallographic data and structure refinement parameters for each co-crystal is given in table below:



**Table S1.** Crystallographic details of **BIMB-TA**

| <b>BIMB-TA</b>                              | <b>100K</b>                                                   | <b>150K</b>                                                   | <b>200K</b>                                                   | <b>250K</b>                                                   | <b>300K</b>                                                   |
|---------------------------------------------|---------------------------------------------------------------|---------------------------------------------------------------|---------------------------------------------------------------|---------------------------------------------------------------|---------------------------------------------------------------|
| Moiety formula                              | C <sub>22</sub> H <sub>20</sub> N <sub>4</sub> O <sub>4</sub> | C <sub>22</sub> H <sub>20</sub> N <sub>4</sub> O <sub>4</sub> | C <sub>22</sub> H <sub>20</sub> N <sub>4</sub> O <sub>4</sub> | C <sub>22</sub> H <sub>20</sub> N <sub>4</sub> O <sub>4</sub> | C <sub>22</sub> H <sub>20</sub> N <sub>4</sub> O <sub>4</sub> |
| Crystal system                              | Monoclinic                                                    | Monoclinic                                                    | Monoclinic                                                    | Monoclinic                                                    | Monoclinic                                                    |
| Space group                                 | <i>C2/c</i>                                                   | <i>C2/c</i>                                                   | <i>C2/c</i>                                                   | <i>C2/c</i>                                                   | <i>C2/c</i>                                                   |
| <i>a</i> /Å                                 | 28.293(3)                                                     | 28.341(3)                                                     | 28.394(3)                                                     | 28.446(3)                                                     | 28.507(4)                                                     |
| <i>b</i> /Å                                 | 6.7462(8)                                                     | 6.7394(8)                                                     | 6.7333(8)                                                     | 6.7253(8)                                                     | 6.7177(8)                                                     |
| <i>c</i> /Å                                 | 11.0709(12)                                                   | 11.0937(12)                                                   | 11.1211(12)                                                   | 11.1474(12)                                                   | 11.1775(13)                                                   |
| <i>α</i> (°)                                | 90                                                            | 90                                                            | 90                                                            | 90                                                            | 90                                                            |
| <i>β</i> (°)                                | 106.737(4)                                                    | 106.681(4)                                                    | 106.624(4)                                                    | 106.568(4)                                                    | 106.525(4)                                                    |
| <i>γ</i> (°)                                | 90                                                            | 90                                                            | 90                                                            | 90                                                            | 90                                                            |
| <i>V</i> /Å <sup>3</sup>                    | 2023.6(4)                                                     | 2029.8(4)                                                     | 2037.3(4)                                                     | 2044.1(4)                                                     | 2052.1(4)                                                     |
| <i>Z</i>                                    | 4                                                             | 4                                                             | 4                                                             | 4                                                             | 4                                                             |
| <i>D</i> <sub>cal</sub> /g cm <sup>-3</sup> | 1.327                                                         | 1.323                                                         | 1.319                                                         | 1.314                                                         | 1.309                                                         |
| T/K                                         | 100(2)                                                        | 150(2)                                                        | 200(2)                                                        | 250(2)                                                        | 300(2)                                                        |
| <i>μ</i> /mm <sup>-1</sup>                  | 0.094                                                         | 0.093                                                         | 0.093                                                         | 0.093                                                         | 0.092                                                         |
| <i>F</i> <sub>000</sub>                     | 848                                                           | 848                                                           | 848                                                           | 848                                                           | 848                                                           |
| *Crystal size/mm <sup>3</sup>               | 0.480×0.190×<br>0.180                                         | 0.480×0.190×<br>0.180                                         | 0.480×0.190×<br>0.180                                         | 0.480×0.190×<br>0.180                                         | 0.480×0.190×<br>0.180                                         |
| Reflections measured                        | 22052                                                         | 22230                                                         | 22382                                                         | 22460                                                         | 22584                                                         |
| Unique reflections                          | 2513                                                          | 2515                                                          | 2530                                                          | 2536                                                          | 2546                                                          |
| Observed reflections                        | 2298                                                          | 2255                                                          | 2231                                                          | 2195                                                          | 2150                                                          |
| Parameters                                  | 152                                                           | 140                                                           | 140                                                           | 140                                                           | 140                                                           |
| <i>R</i> <sub>int</sub>                     | 0.0336                                                        | 0.0295                                                        | 0.0269                                                        | 0.0261                                                        | 0.0263                                                        |
| final <i>R</i> ( <i>I</i> >2σ( <i>I</i> ))  | 0.0387                                                        | 0.0393                                                        | 0.0398                                                        | 0.0415                                                        | 0.0424                                                        |
| final <i>R</i> (all data)                   | 0.0419                                                        | 0.0436                                                        | 0.0454                                                        | 0.0479                                                        | 0.0506                                                        |

|                                             |                                                               |                                                               |                                                               |                                                               |         |
|---------------------------------------------|---------------------------------------------------------------|---------------------------------------------------------------|---------------------------------------------------------------|---------------------------------------------------------------|---------|
| GOF on F <sup>2</sup>                       | 1.025                                                         | 1.038                                                         | 1.033                                                         | 1.043                                                         | 1.068   |
| CCDC no                                     | 2190757                                                       | 2190759                                                       | 2190758                                                       | 2190763                                                       | 2190760 |
| <b>BIMB-TA</b>                              | <b>350K</b>                                                   | <b>400K</b>                                                   | <b>450K</b>                                                   | <b>500K</b>                                                   |         |
| Moiety formula                              | C <sub>22</sub> H <sub>20</sub> N <sub>4</sub> O <sub>4</sub> | C <sub>22</sub> H <sub>20</sub> N <sub>4</sub> O <sub>4</sub> | C <sub>22</sub> H <sub>20</sub> N <sub>4</sub> O <sub>4</sub> | C <sub>22</sub> H <sub>20</sub> N <sub>4</sub> O <sub>4</sub> |         |
| Crystal system                              | Monoclinic                                                    | Monoclinic                                                    | Monoclinic                                                    | Monoclinic                                                    |         |
| Space group                                 | <i>C2/c</i>                                                   | <i>C2/c</i>                                                   | <i>C2/c</i>                                                   | <i>C2/c</i>                                                   |         |
| <i>a</i> /Å                                 | 28.556(3)                                                     | 28.607(4)                                                     | 28.670(5)                                                     | 28.740(5)                                                     |         |
| <i>b</i> /Å                                 | 6.7097(8)                                                     | 6.7015(8)                                                     | 6.6867(11)                                                    | 6.6810(12)                                                    |         |
| <i>c</i> /Å                                 | 11.2036(13)                                                   | 11.2320(13)                                                   | 11.2601(18)                                                   | 11.2925(19)                                                   |         |
| <i>α</i> (°)                                | 90                                                            | 90                                                            | 90                                                            | 90                                                            |         |
| <i>β</i> (°)                                | 106.450(4)                                                    | 106.380(4)                                                    | 106.366(6)                                                    | 106.308(6)                                                    |         |
| <i>γ</i> (°)                                | 90                                                            | 90                                                            | 90                                                            | 90                                                            |         |
| <i>V</i> /Å <sup>3</sup>                    | 2058.8(4)                                                     | 2065.9(4)                                                     | 2071.2(6)                                                     | 2081.0(6)                                                     |         |
| <i>Z</i>                                    | 4                                                             | 4                                                             | 4                                                             | 4                                                             |         |
| <i>D</i> <sub>cal</sub> /g cm <sup>-3</sup> | 1.305                                                         | 1.300                                                         | 1.297                                                         | 1.291                                                         |         |
| T/K                                         | 350(2)                                                        | 400(2)                                                        | 450(2)                                                        | 500(2)                                                        |         |
| <i>μ</i> /mm <sup>-1</sup>                  | 0.092                                                         | 0.092                                                         | 0.092                                                         | 0.091                                                         |         |
| <i>F</i> <sub>000</sub>                     | 848                                                           | 848                                                           | 848                                                           | 848                                                           |         |
| *Crystal size/mm <sup>3</sup>               | 0.480×0.190×<br>0.180                                         | 0.480×0.190×<br>0.180                                         | 0.480×0.190×<br>0.180                                         | 0.480×0.190×<br>0.180                                         |         |
| Reflections<br>measured                     | 22672                                                         | 45366                                                         | 22881                                                         | 22992                                                         |         |
| Unique reflections                          | 2546                                                          | 2558                                                          | 2579                                                          | 2595                                                          |         |
| Observed<br>reflections                     | 2082                                                          | 2124                                                          | 1914                                                          | 1799                                                          |         |
| Parameters                                  | 152                                                           | 152                                                           | 152                                                           | 152                                                           |         |
| <i>R</i> <sub>int</sub>                     | 0.0285                                                        | 0.0319                                                        | 0.0356                                                        | 0.0409                                                        |         |
| final <i>R</i> ( <i>I</i> > 2σ( <i>I</i> )) | 0.0432                                                        | 0.0475                                                        | 0.0453                                                        | 0.0470                                                        |         |
| final <i>R</i> (all data)                   | 0.0539                                                        | 0.0584                                                        | 0.0637                                                        | 0.0704                                                        |         |
| GOF on F <sup>2</sup>                       | 1.035                                                         | 1.077                                                         | 1.037                                                         | 1.034                                                         |         |
| CCDC no                                     | 2190765                                                       | 2190764                                                       | 2190762                                                       | 2190761                                                       |         |

\***Note:** Crystal size has been measured at the 100K data.

**Table S2.** Crystallographic details of **BIMB-BPDCA**

| <b>BIMB-BPDCA</b>                           | <b>100K</b>                                                   | <b>150K</b>                                                   | <b>200K</b>                                                   | <b>250K</b>                                                   | <b>300K</b>                                                   |
|---------------------------------------------|---------------------------------------------------------------|---------------------------------------------------------------|---------------------------------------------------------------|---------------------------------------------------------------|---------------------------------------------------------------|
| Moiety formula                              | C <sub>28</sub> H <sub>24</sub> N <sub>4</sub> O <sub>4</sub> | C <sub>28</sub> H <sub>24</sub> N <sub>4</sub> O <sub>4</sub> | C <sub>28</sub> H <sub>24</sub> N <sub>4</sub> O <sub>4</sub> | C <sub>28</sub> H <sub>24</sub> N <sub>4</sub> O <sub>4</sub> | C <sub>28</sub> H <sub>24</sub> N <sub>4</sub> O <sub>4</sub> |
| Crystal system                              | Monoclinic                                                    | Monoclinic                                                    | Monoclinic                                                    | Monoclinic                                                    | Monoclinic                                                    |
| Space group                                 | <i>P2<sub>1</sub>/n</i>                                       | <i>P2<sub>1</sub>/n</i>                                       | <i>P2<sub>1</sub>/n</i>                                       | <i>P2<sub>1</sub>/n</i>                                       | <i>P2<sub>1</sub>/n</i>                                       |
| <i>a</i> /Å                                 | 6.6714(7)                                                     | 6.6622(7)                                                     | 6.6480(7)                                                     | 6.6319(8)                                                     | 6.6119(17)                                                    |
| <i>b</i> /Å                                 | 18.245(2)                                                     | 18.301(2)                                                     | 18.373(2)                                                     | 18.452(2)                                                     | 18.529(5)                                                     |
| <i>c</i> /Å                                 | 10.1498(13)                                                   | 10.1785(12)                                                   | 10.2097(13)                                                   | 10.2411(14)                                                   | 10.282(3)                                                     |
| <i>α</i> (°)                                | 90                                                            | 90                                                            | 90                                                            | 90                                                            | 90                                                            |
| <i>β</i> (°)                                | 108.052(4)                                                    | 107.716(4)                                                    | 107.337(4)                                                    | 106.930(5)                                                    | 106.490(10)                                                   |
| <i>γ</i> (°)                                | 90                                                            | 90                                                            | 90                                                            | 90                                                            | 90                                                            |
| <i>V</i> /Å <sup>3</sup>                    | 1174.6(2)                                                     | 1182.1(2)                                                     | 1190.4(2)                                                     | 1198.9(3)                                                     | 1207.9(6)                                                     |
| <i>Z</i>                                    | 2                                                             | 2                                                             | 2                                                             | 2                                                             | 2                                                             |
| <i>D</i> <sub>cal</sub> /g cm <sup>-3</sup> | 1.359                                                         | 1.350                                                         | 1.341                                                         | 1.331                                                         | 1.321                                                         |
| T/K                                         | 100(2)                                                        | 150(2)                                                        | 200(2)                                                        | 250(2)                                                        | 300(2)                                                        |
| <i>μ</i> /mm <sup>-1</sup>                  | 0.093                                                         | 0.092                                                         | 0.092                                                         | 0.091                                                         | 0.090                                                         |
| <i>F</i> <sub>000</sub>                     | 504                                                           | 504                                                           | 504                                                           | 504                                                           | 504                                                           |
| *Crystal size/mm <sup>3</sup>               | 0.370×0.210×<br>0.050                                         | 0.370×0.210×<br>0.050                                         | 0.370×0.210×<br>0.050                                         | 0.370×0.210×<br>0.050                                         | 0.370×0.210×<br>0.050                                         |
| Reflections measured                        | 17897                                                         | 18342                                                         | 18547                                                         | 18674                                                         | 18840                                                         |
| Unique reflections                          | 2919                                                          | 2941                                                          | 2956                                                          | 2972                                                          | 3015                                                          |
| Observed reflections                        | 2592                                                          | 2562                                                          | 2492                                                          | 2400                                                          | 2276                                                          |
| Parameters                                  | 167                                                           | 179                                                           | 175                                                           | 179                                                           | 179                                                           |
| <i>R</i> <sub>int</sub>                     | 0.0399                                                        | 0.0274                                                        | 0.0271                                                        | 0.0439                                                        | 0.0454                                                        |
| final <i>R</i> ( <i>I</i> > 2σ( <i>I</i> )) | 0.0560                                                        | 0.0433                                                        | 0.0447                                                        | 0.0475                                                        | 0.0504                                                        |
| final <i>R</i> (all data)                   | 0.0626                                                        | 0.0505                                                        | 0.0540                                                        | 0.0596                                                        | 0.0688                                                        |

|                                             |                                                               |                                                               |                                                               |         |         |
|---------------------------------------------|---------------------------------------------------------------|---------------------------------------------------------------|---------------------------------------------------------------|---------|---------|
| GOF on F <sup>2</sup>                       | 1.040                                                         | 1.031                                                         | 1.065                                                         | 1.029   | 1.047   |
| CCDC no                                     | 2190766                                                       | 2190771                                                       | 2190767                                                       | 2190768 | 2190770 |
| <b>BIMB-BPDCA</b>                           | <b>350K</b>                                                   | <b>400K</b>                                                   | <b>450K</b>                                                   |         |         |
| Moiety formula                              | C <sub>28</sub> H <sub>24</sub> N <sub>4</sub> O <sub>4</sub> | C <sub>28</sub> H <sub>24</sub> N <sub>4</sub> O <sub>4</sub> | C <sub>28</sub> H <sub>24</sub> N <sub>4</sub> O <sub>4</sub> |         |         |
| Crystal system                              | Monoclinic                                                    | Monoclinic                                                    | Monoclinic                                                    |         |         |
| Space group                                 | <i>P</i> 2 <sub>1</sub> / <i>n</i>                            | <i>P</i> 2 <sub>1</sub> / <i>n</i>                            | <i>P</i> 2 <sub>1</sub> / <i>n</i>                            |         |         |
| <i>a</i> /Å                                 | 6.5953(9)                                                     | 6.5718(9)                                                     | 6.5537(9)                                                     |         |         |
| <i>b</i> /Å                                 | 18.631(3)                                                     | 18.708(3)                                                     | 18.802(3)                                                     |         |         |
| <i>c</i> /Å                                 | 10.3065(17)                                                   | 10.3308(17)                                                   | 10.3681(18)                                                   |         |         |
| <i>α</i> (°)                                | 90                                                            | 90                                                            | 90                                                            |         |         |
| <i>β</i> (°)                                | 105.967(5)                                                    | 105.470(5)                                                    | 104.937(6)                                                    |         |         |
| <i>γ</i> (°)                                | 90                                                            | 90                                                            | 90                                                            |         |         |
| <i>V</i> /Å <sup>3</sup>                    | 1217.6(3)                                                     | 1224.1(3)                                                     | 1234.4(3)                                                     |         |         |
| <i>Z</i>                                    | 2                                                             | 2                                                             | 2                                                             |         |         |
| <i>D</i> <sub>cal</sub> /g cm <sup>-3</sup> | 1.311                                                         | 1.304                                                         | 1.293                                                         |         |         |
| T/K                                         | 350(2)                                                        | 400(2)                                                        | 450(2)                                                        |         |         |
| <i>μ</i> /mm <sup>-1</sup>                  | 0.090                                                         | 0.089                                                         | 0.088                                                         |         |         |
| <i>F</i> <sub>000</sub>                     | 504                                                           | 504                                                           | 504                                                           |         |         |
| *Crystal size/mm <sup>3</sup>               | 0.370×0.210×<br>0.050                                         | 0.370×0.210×<br>0.050                                         | 0.370×0.210×<br>0.050                                         |         |         |
| Reflections measured                        | 16960                                                         | 19382                                                         | 19694                                                         |         |         |
| Unique reflections                          | 2529                                                          | 3039                                                          | 3067                                                          |         |         |
| Observed reflections                        | 1977                                                          | 2000                                                          | 1825                                                          |         |         |
| Parameters                                  | 167                                                           | 179                                                           | 179                                                           |         |         |
| <i>R</i> <sub>int</sub>                     | 0.0435                                                        | 0.0487                                                        | 0.0519                                                        |         |         |
| final <i>R</i> ( <i>I</i> > 2σ( <i>I</i> )) | 0.0503                                                        | 0.0567                                                        | 0.0606                                                        |         |         |
| final <i>R</i> (all data)                   | 0.0651                                                        | 0.0890                                                        | 0.1036                                                        |         |         |
| GOF on F <sup>2</sup>                       | 1.048                                                         | 1.026                                                         | 1.033                                                         |         |         |
| CCDC no                                     | 2190772                                                       | 2190769                                                       | 2190773                                                       |         |         |

\*Note: Crystal size has been measured at the 100K data.

**Table S3.** Change of Unit cell parameters of **BIMB-TA** with change of temperature

| Temperature (K) | <i>a</i> (Å) | <i>b</i> (Å) | <i>c</i> (Å) | $\alpha$ (°) | $\beta$ (°) | $\gamma$ (°) | Vol.(Å <sup>3</sup> ) |
|-----------------|--------------|--------------|--------------|--------------|-------------|--------------|-----------------------|
| 100             | 28.293(3)    | 6.7462(8)    | 11.0709(12)  | 90           | 106.737(4)  | 90           | 2023.6(4)             |
| 150             | 28.341(3)    | 6.7394(8)    | 11.0937(12)  | 90           | 106.681(4)  | 90           | 2029.8(4)             |
| 200             | 28.394(3)    | 6.7333(8)    | 11.1211(12)  | 90           | 106.624(4)  | 90           | 2037.3(4)             |
| 250             | 28.446(3)    | 6.7253(8)    | 11.1474(12)  | 90           | 106.568(4)  | 90           | 2044.1(4)             |
| 300             | 28.507(4)    | 6.7177(8)    | 11.1775(13)  | 90           | 106.525(4)  | 90           | 2052.1(4)             |
| 350             | 28.556(3)    | 6.7097(8)    | 11.2036(13)  | 90           | 106.450(4)  | 90           | 2058.8(4)             |
| 400             | 28.607(3)    | 6.7015(8)    | 11.2320(13)  | 90           | 106.380(4)  | 90           | 2065.9(4)             |
| 450             | 28.670(5)    | 6.6867(11)   | 11.2601(18)  | 90           | 106.366(6)  | 90           | 2071.1(6)             |
| 500             | 28.740(5)    | 6.6810(12)   | 11.2925(19)  | 90           | 106.308(6)  | 90           | 2081.0(6)             |

Note: NTE of *b* axis from 100K to 500K highlighted by light orange color

**Table S4.** Change of Unit cell parameters of **BIMB-BPDCA** with change of temperature

| Temperature (K) | <i>a</i> (Å) | <i>b</i> (Å) | <i>c</i> (Å) | $\alpha$ (°) | $\beta$ (°) | $\gamma$ (°) | Vol.(Å <sup>3</sup> ) |
|-----------------|--------------|--------------|--------------|--------------|-------------|--------------|-----------------------|
| 100             | 6.6714(7)    | 18.245(2)    | 10.1498(13)  | 90           | 108.052(4)  | 90           | 1174.6(2)             |
| 150             | 6.6622(7)    | 18.301(2)    | 10.1785(12)  | 90           | 107.716(4)  | 90           | 1182.1(2)             |
| 200             | 6.6480(7)    | 18.373(2)    | 10.2097(13)  | 90           | 107.337(4)  | 90           | 1190.4(2)             |
| 250             | 6.6319(8)    | 18.452(2)    | 10.2411(14)  | 90           | 106.930(5)  | 90           | 1198.9(3)             |
| 300             | 6.6119(17)   | 18.529(5)    | 10.282(3)    | 90           | 106.490(10) | 90           | 1207.9(6)             |
| 350             | 6.5953(9)    | 18.631(3)    | 10.3065(17)  | 90           | 105.967(5)  | 90           | 1217.6(3)             |
| 400             | 6.5718(9)    | 18.708(3)    | 10.3308(17)  | 90           | 105.470(5)  | 90           | 1224.1(3)             |
| 450             | 6.5537(9)    | 18.802(3)    | 10.3681(18)  | 90           | 104.937(6)  | 90           | 1234.4(3)             |

Note: NTE of *a* axis from 100K to 450K highlighted by light green color

**Table S5.** Calculation of thermal expansion coefficients of **BIMB-TA** and **BIMB-BPDCA** and by PASCAL program.<sup>5</sup>

| Cocrystals        | Axes  | $\alpha(\text{MK}^{-1})$ | $\sigma\alpha(\text{MK}^{-1})$ | Directions |         |         |
|-------------------|-------|--------------------------|--------------------------------|------------|---------|---------|
|                   |       |                          |                                | a          | b       | c       |
| <b>BIMB-TA</b>    | $X_1$ | -24.6114                 | 0.9115                         | -0.0000    | 1.0000  | -0.0000 |
|                   | $X_2$ | 35.7840                  | 0.8289                         | -0.6268    | 0.0000  | 0.7791  |
|                   | $X_3$ | 59.0444                  | 0.6220                         | 0.2569     | -0.0000 | 0.9664  |
|                   | V     | 70.2946                  | 1.1427                         |            |         |         |
| <b>BIMB-BPDCA</b> | $X_1$ | -73.8290                 | 3.4588                         | 0.9730     | -0.0000 | -0.2309 |
|                   | $X_2$ | 88.5435                  | 2.4994                         | 0.0000     | 1.0000  | 0.0000  |
|                   | $X_3$ | 129.3825                 | 2.2908                         | 0.6767     | -0.0000 | 0.7363  |
|                   | V     | 145.8850                 | 1.9874                         |            |         |         |

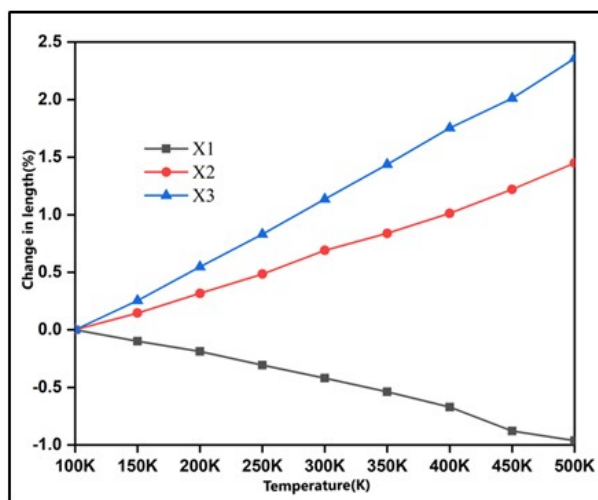

(a)

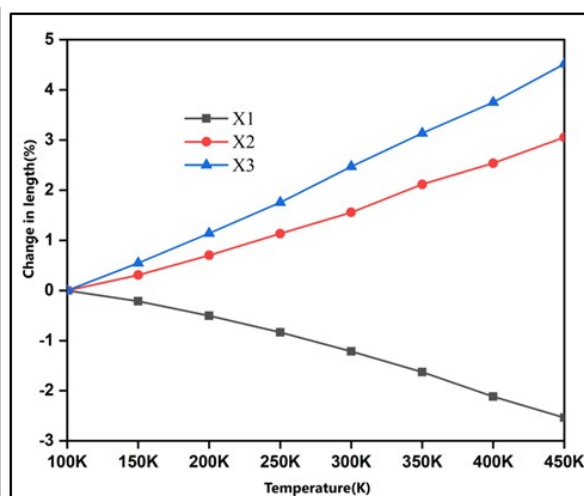

(b)

**Figure S8(a)** Percent change in length of the principal axes with temperature in (a) **BIMB-TA** and (b) **BIMB-BPDCA**

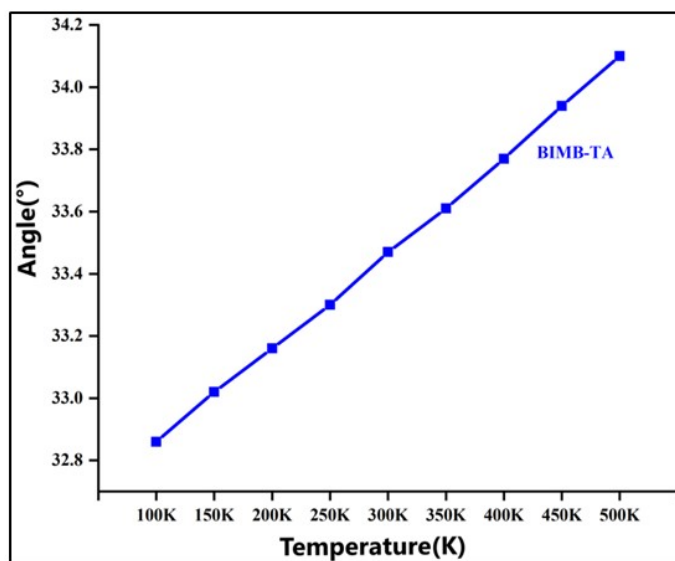

**Figure S9.** Change of tilt angle of TA molecules along *b* axis in the crystal structure of BIMB-TA with increasing temperature.

**Tilt Angle of TA molecules in the crystal structure of BIMB-TA at different temperature**

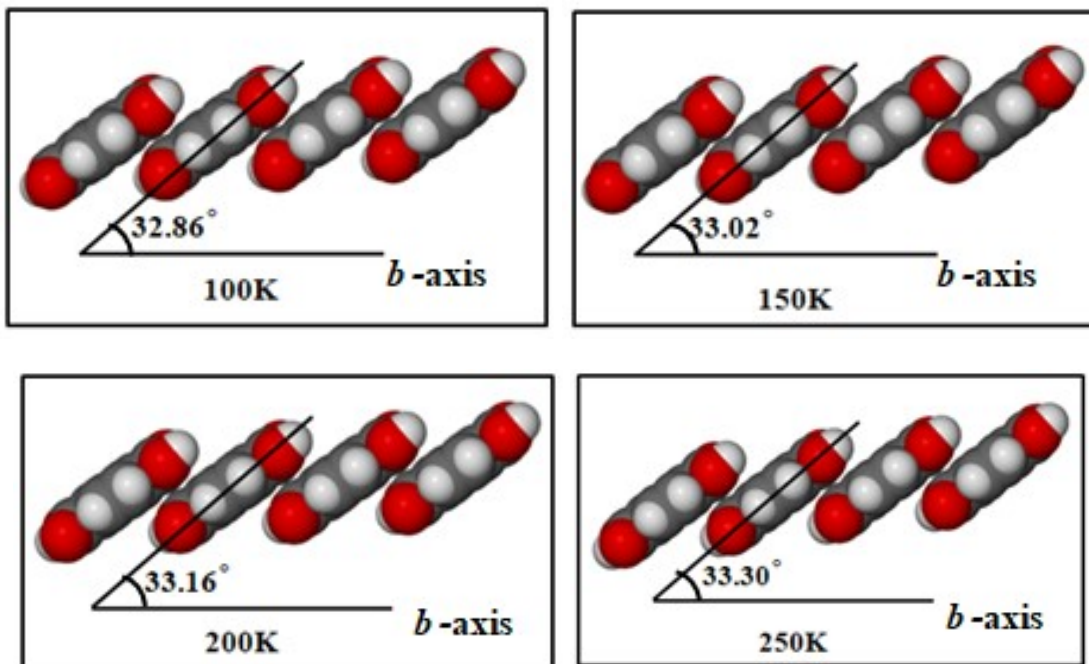

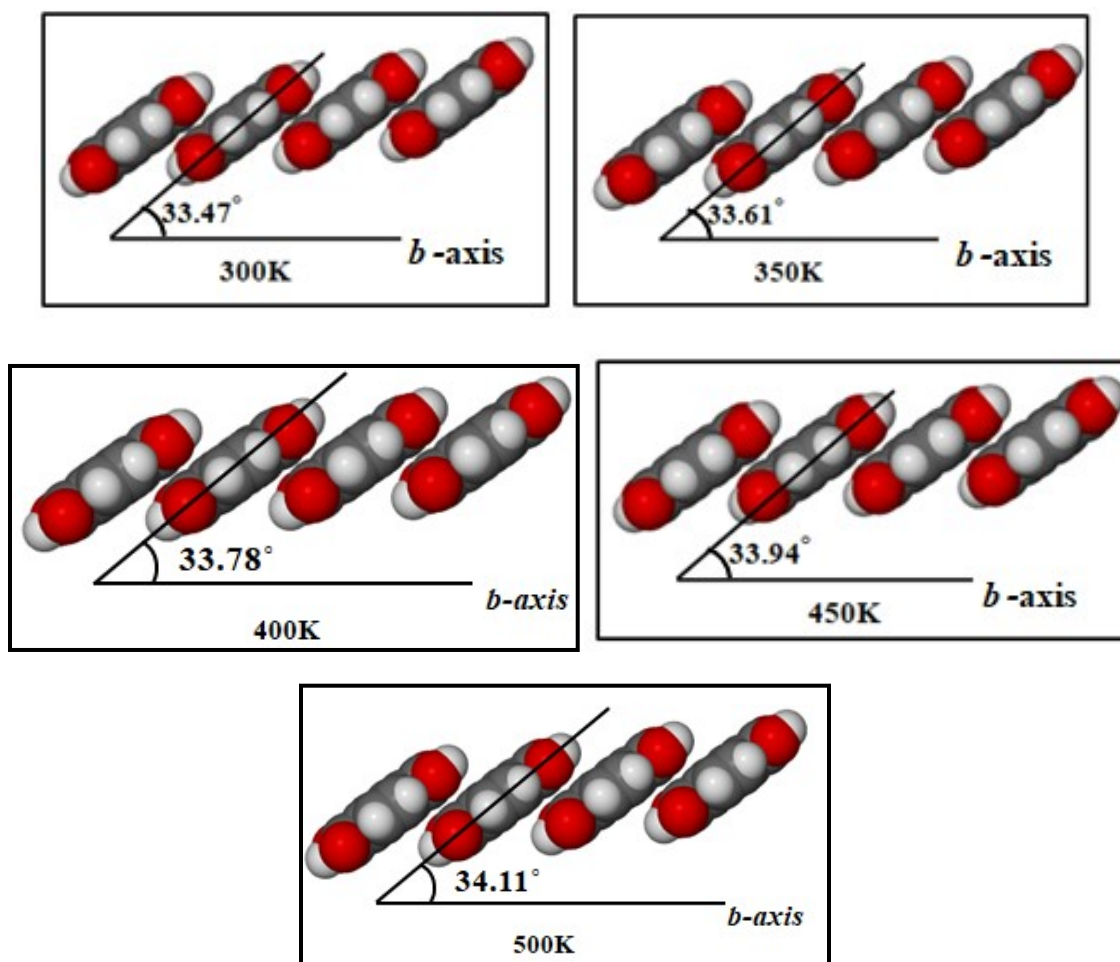

**Figure S10.** Tiltation of TA molecules along *b* axis in the crystal structure of **BIMB-TA** at different temperature.



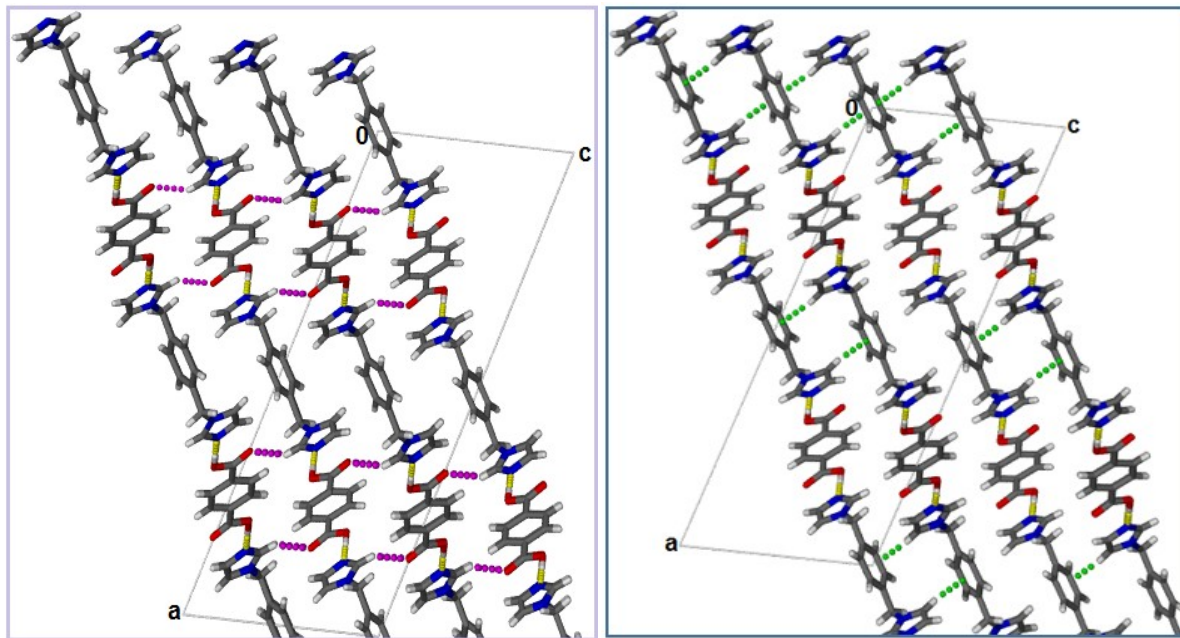

**Figure S11.** Packing of molecules in the crystal structure of **BIMB-TA**.(a) C–H···O(magenta)(b) C–H··· $\pi$  interactions are shown in green dotted lines.

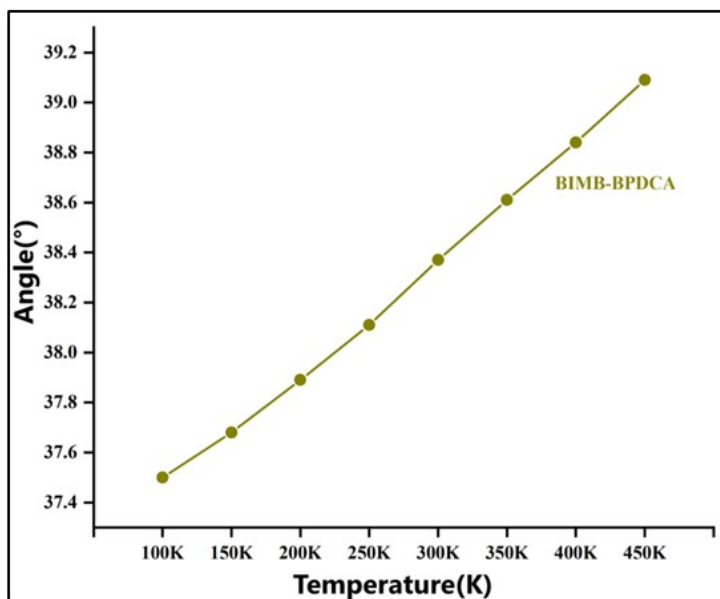

**Figure S12.** Change of tilt angle of **BPDCA** molecules in the crystal structure of **BIMB-BPDCA** determined at different temperature

**Tilt angle of BPDCA molecules in the crystal structure of BIMB-BPDCA determined at different temperature BIMB-BPDCA**

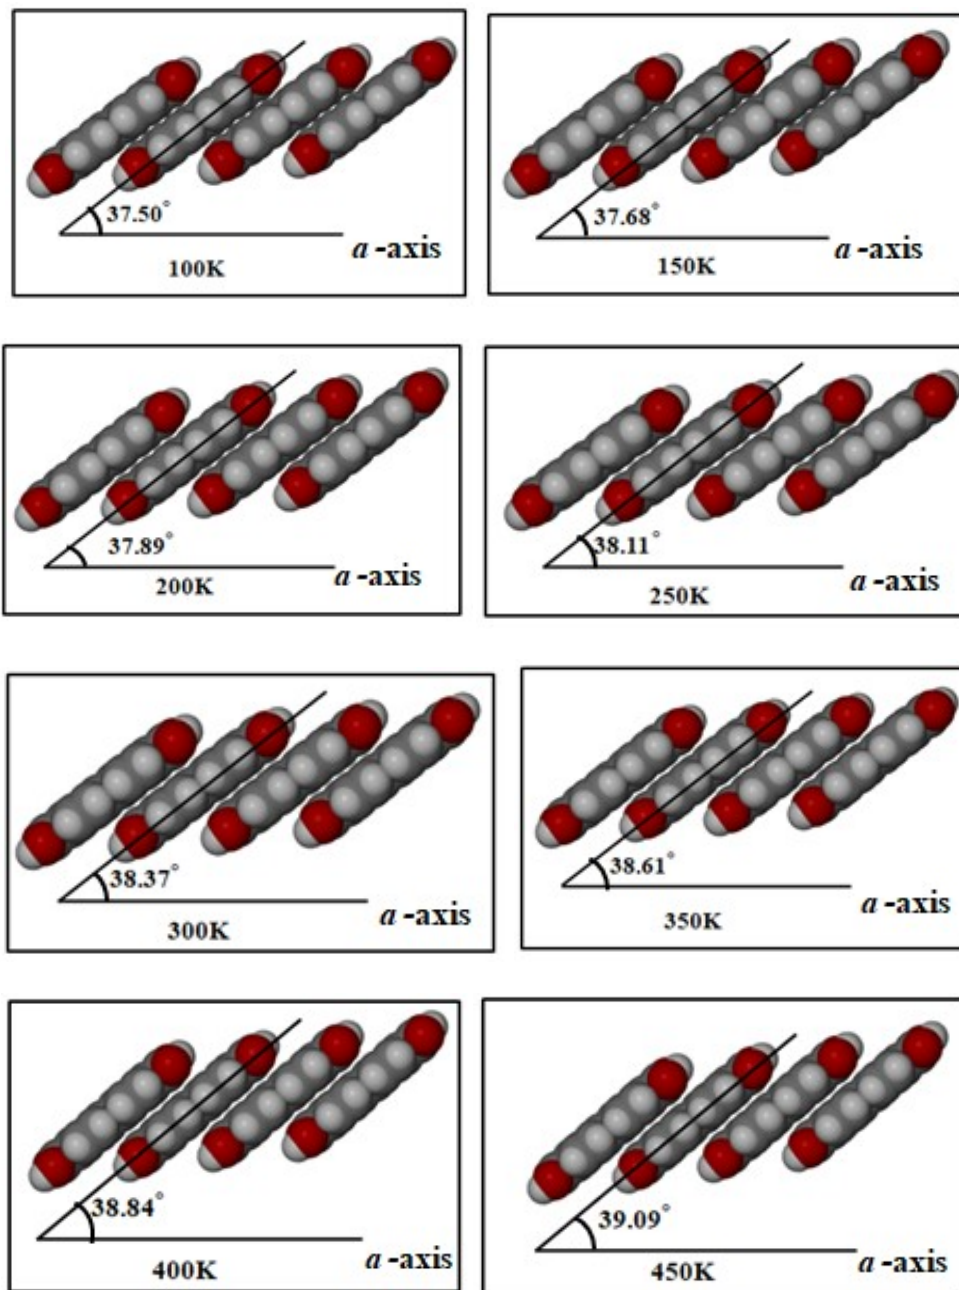

**Figure S13.** Tiltation of BPDCA molecule along *a*-axis in the crystal structure of BIMB-BPDCA at different temperature.

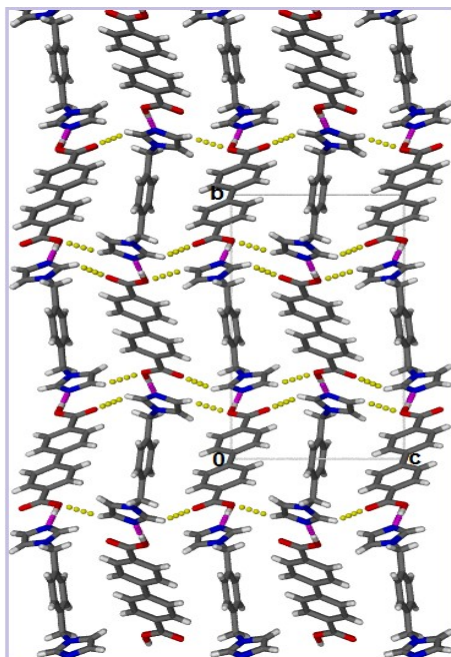

**Figure S14.** Intermolecular interactions in the crystal structure of **BIMB-BPDCA** viewed down *a* axis: C–H···O hydrogen bonding interactions shown in yellow colour.

**Table S6.** Hydrogen bonding parameters in the crystal structures of **BIMB-TA** determined at different temperature<sup>6</sup>.

| Donor– H···Acceptor  | T(K) | D – H (Å) | H···A (Å) | D···A (Å)  | $\angle$ D – H···A (°) |
|----------------------|------|-----------|-----------|------------|------------------------|
| O(1) – H(1A) ···N(1) | 100K | 0.98(2)   | 1.61(2)   | 2.5914(14) | 179(2)                 |
|                      | 150K | 0.96(2)   | 1.63(2)   | 2.5942(14) | 179(2)                 |
|                      | 200K | 0.98(2)   | 1.62(2)   | 2.5971(15) | 178(2)                 |
|                      | 250K | 0.98(2)   | 1.62(2)   | 2.6013(16) | 179(3)                 |
|                      | 300K | 0.97(2)   | 1.64(2)   | 2.6053(16) | 178(2)                 |
|                      | 350K | 0.98(3)   | 1.63(3)   | 2.6088(18) | 178(2)                 |
|                      | 400K | 0.98(3)   | 1.63(3)   | 2.6120(18) | 177(2)                 |
|                      | 450K | 0.96(3)   | 1.65(3)   | 2.6142(19) | 178(3)                 |

|                                   |             |                    |                              |                              |                                                      |
|-----------------------------------|-------------|--------------------|------------------------------|------------------------------|------------------------------------------------------|
|                                   | <b>500K</b> | 0.96(3)            | 1.66(3)                      | 2.620(2)                     | 179(3)                                               |
| <b>C(5) – H(5) …O(2)</b>          |             | <b>C(5) – H(5)</b> | <b>H(5) …O(2)</b>            | <b>C(5) …O(2)</b>            | <b>C(5) -H(5)…O(2)</b>                               |
|                                   | <b>100K</b> | 0.95               | 2.32                         | 3.1293(14)                   | 143                                                  |
|                                   | <b>150K</b> | 0.95               | 2.33                         | 3.1368(14)                   | 143                                                  |
|                                   | <b>200K</b> | 0.95               | 2.33                         | 3.1452(16)                   | 143                                                  |
|                                   | <b>250K</b> | 0.94               | 2.35                         | 3.1537(16)                   | 143                                                  |
|                                   | <b>300K</b> | 0.93               | 2.37                         | 3.1633(18)                   | 143                                                  |
|                                   | <b>350K</b> | 0.93               | 2.37                         | 3.1714(18)                   | 144                                                  |
|                                   | <b>400K</b> | 0.93               | 2.38                         | 3.1810(19)                   | 144                                                  |
|                                   | <b>450K</b> | 0.93               | 2.39                         | 3.191(2)                     | 144                                                  |
|                                   | <b>500K</b> | 0.93               | 2.40                         | 3.200(2)                     | 144                                                  |
| <b>C(7)–H(7)…<math>\pi</math></b> |             | <b>C(7)–H(7)</b>   | <b>H(7)…<math>\pi</math></b> | <b>C(7)…<math>\pi</math></b> | <b><math>\angle</math>C(7)–H(7)…<math>\pi</math></b> |
|                                   | <b>100K</b> | 0.97(2)            | 2.809(18)                    | 3.7577(15)                   | 166.7(14)                                            |
|                                   | <b>150K</b> | 0.950              | 2.83                         | 3.7677(16)                   | 171                                                  |
|                                   | <b>200K</b> | 0.950              | 2.84                         | 3.7789(16)                   | 170                                                  |
|                                   | <b>250K</b> | 0.940              | 2.86                         | 3.7923(19)                   | 170                                                  |
|                                   | <b>300K</b> | 0.930              | 2.89                         | 3.807(2)                     | 170                                                  |
|                                   | <b>350K</b> | 0.95(2)            | 2.91(2)                      | 3.818(2)                     | 162.2(16)                                            |
|                                   | <b>400K</b> | 0.94(3)            | 2.93(2)                      | 3.831(2)                     | 161.1(18)                                            |
|                                   | <b>450K</b> | 0.92(3)            | 2.97(2)                      | 3.846(2)                     | 160.1(18)                                            |
|                                   | <b>500K</b> | 0.92(3)            | 2.99(2)                      | 3.861(3)                     | 159.3(18)                                            |

**Table S7.** Hydrogen bonding parameters in the crystal structures of **BIMB-BPDCA** determined at different temperature.

| <b>Donor – H···Acceptor</b> | <b>T(K)</b> | <b>D – H (Å)</b>  | <b>H···A (Å)</b>   | <b>D···A (Å)</b>   | <b>∠D – H···A (°)</b>     |
|-----------------------------|-------------|-------------------|--------------------|--------------------|---------------------------|
| <b>O(1)– H(1A)···N(1)</b>   | <b>100K</b> | 0.95(2)           | 1.60(2)            | 2.545(2)           | 176(2)                    |
|                             | <b>150K</b> | 0.950(16)         | 1.600(17)          | 2.5496(15)         | 177.9(18)                 |
|                             | <b>200K</b> | 0.949(16)         | 1.609(17)          | 2.5566(17)         | 178(2)                    |
|                             | <b>250K</b> | 0.950(16)         | 1.613(17)          | 2.5625(18)         | 179(2)                    |
|                             | <b>300K</b> | 0.951(19)         | 1.618(19)          | 2.569(2)           | 178(3)                    |
|                             | <b>350K</b> | 0.952(19)         | 1.630(19)          | 2.579(2)           | 174(2)                    |
|                             | <b>400K</b> | 0.95(2)           | 1.63(2)            | 2.582(2)           | 176(3)                    |
|                             | <b>450K</b> | 0.95(2)           | 1.64(2)            | 2.587(3)           | 176(3)                    |
| <b>C(1)– H(1)···O(2)</b>    |             | <b>C(1)– H(1)</b> | <b>H(1)···O2</b>   | <b>C(1)···O(2)</b> | <b>∠C(1)– H(1)···O(2)</b> |
|                             | <b>100K</b> | 0.95              | 2.32               | 3.069(2)           | 135                       |
|                             | <b>150K</b> | 0.965(16)         | 2.281(16)          | 3.0732(17)         | 138.7(12)                 |
|                             | <b>200K</b> | 0.95              | 2.32               | 3.0817(18)         | 137                       |
|                             | <b>250K</b> | 0.953(18)         | 2.304(18)          | 3.0895(19)         | 139.3(14)                 |
|                             | <b>300K</b> | 0.959(19)         | 2.303(19)          | 3.100(2)           | 140.1(14)                 |
|                             | <b>350K</b> | 0.93              | 2.34               | 3.105(2)           | 140                       |
|                             | <b>400K</b> | 0.99(2)           | 2.28(2)            | 3.112(3)           | 141.7(16)                 |
|                             | <b>450K</b> | 1.00(3)           | 2.27(3)            | 3.121(3)           | 142.5(18)                 |
| <b>C(2)– H(2)···O(1)</b>    |             | <b>C(2)– H(2)</b> | <b>H(2)···O(1)</b> | <b>C(2)···O(1)</b> | <b>∠C(2)– H(2)···O(1)</b> |
|                             | <b>100K</b> | 0.95              | 2.44               | 3.061(2)           | 123                       |
|                             | <b>150K</b> | 0.948(19)         | 2.525(17)          | 3.0767(16)         | 117.3(14)                 |
|                             | <b>200K</b> | 0.942(19)         | 2.531(18)          | 3.0982(17)         | 119.0(14)                 |
|                             | <b>250K</b> | 0.95(2)           | 2.551(18)          | 3.1165(19)         | 118.5(14)                 |
|                             | <b>300K</b> | 0.95(2)           | 2.55(2)            | 3.141(2)           | 120.1(15)                 |
|                             | <b>350K</b> | 0.93              | 2.55               | 3.166(2)           | 124                       |
|                             | <b>400K</b> | 0.96(2)           | 2.59(2)            | 3.185(2)           | 120.4(15)                 |
|                             | <b>450K</b> | 0.97(3)           | 2.61(3)            | 3.214(3)           | 121(2)                    |

## 5. Powder X-ray Diffraction

Powder X-ray diffractogram was measured on Rigaku powder X-ray diffractometer (Miniflex600 with Cu K $\alpha$  radiation,  $\lambda = 1.54059 \text{ \AA}$ ) operating in Bragg–Brentano geometry. Crystals of the compound was crushed gently and layered on a sample holder. Data was recorded at room temperature at a scan rate of 2°/min from 5° to 40° (2 $\theta$  value).

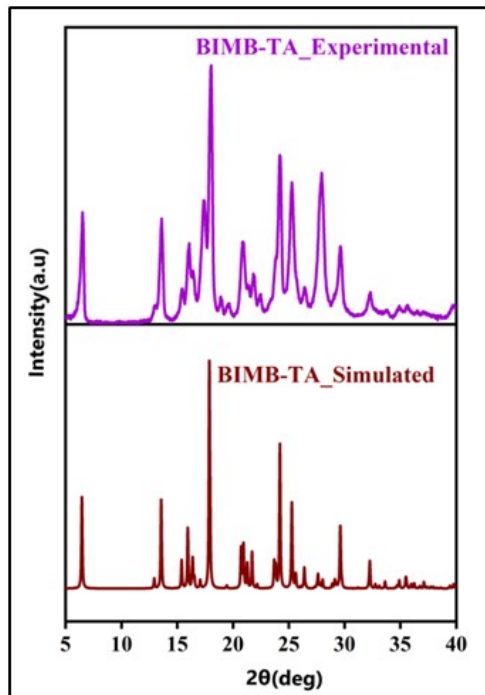

**Figure S15.** Powder X-ray Diffractogram of bulk sample of BIMB-TA (purple) and simulated pattern obtained from SCXRD data (red)

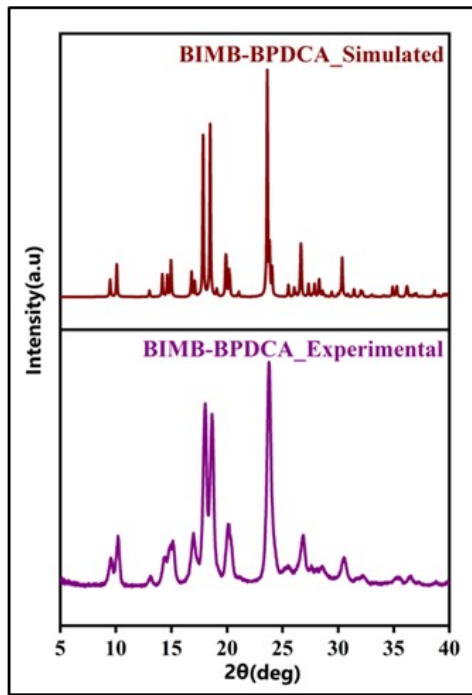

**Figure S16.** Powder X-ray Diffractogram of bulk sample of BIMB-BPDCA (purple) and simulated pattern obtained from SCXRD data (red)

## 6. Thermal Ellipsoid plot of the asymmetric unit at different temperatures

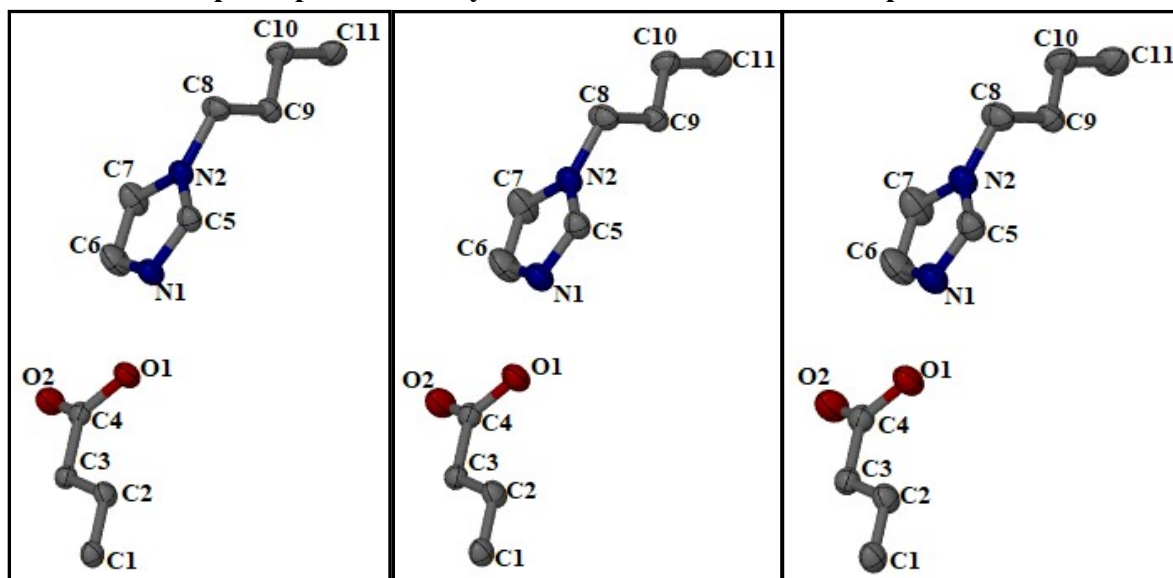

100K

150K

200K

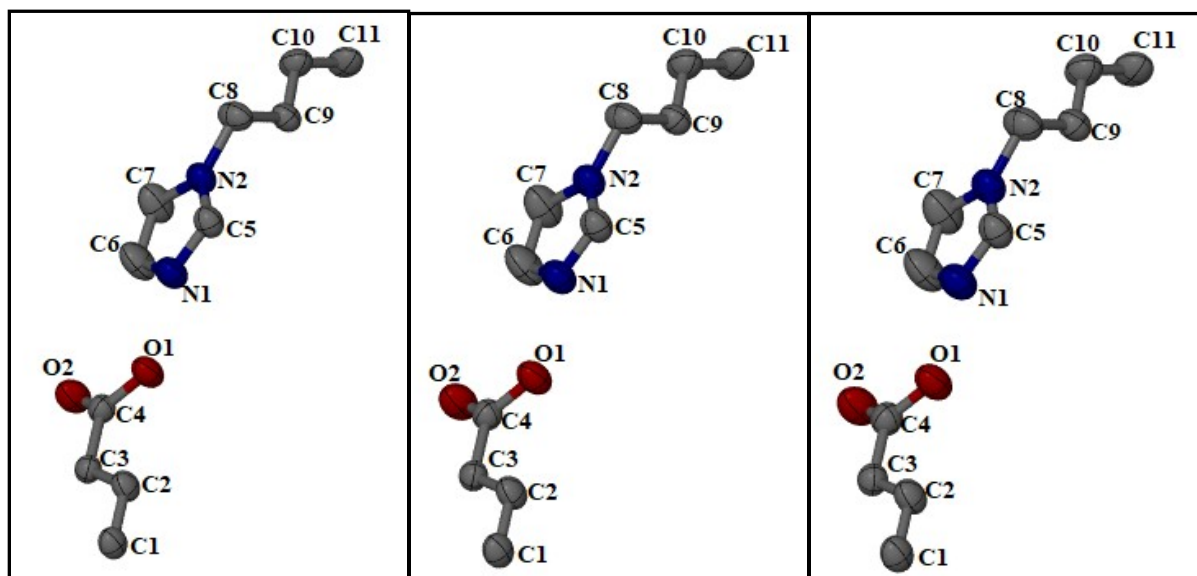

250K

300K

350K



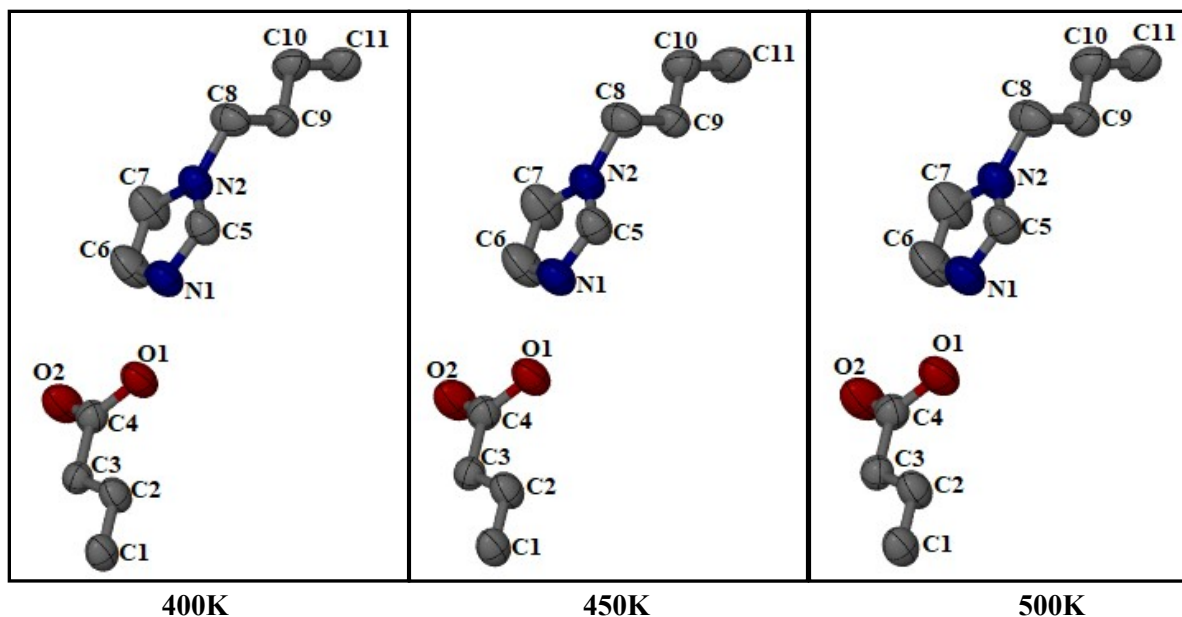

**Figure S17.** Thermal ellipsoid plot of the molecule in the asymmetric unit of the crystal structure of **BIMB-TA** at different temperature. Thermal ellipsoid plots are shown in 50 % probability.

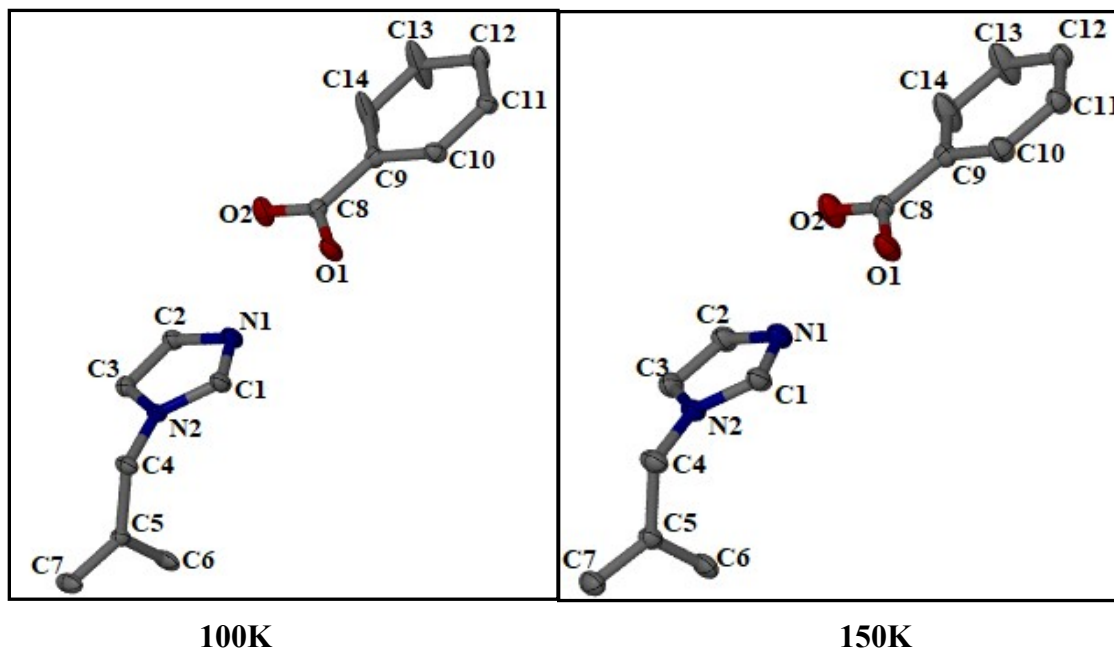



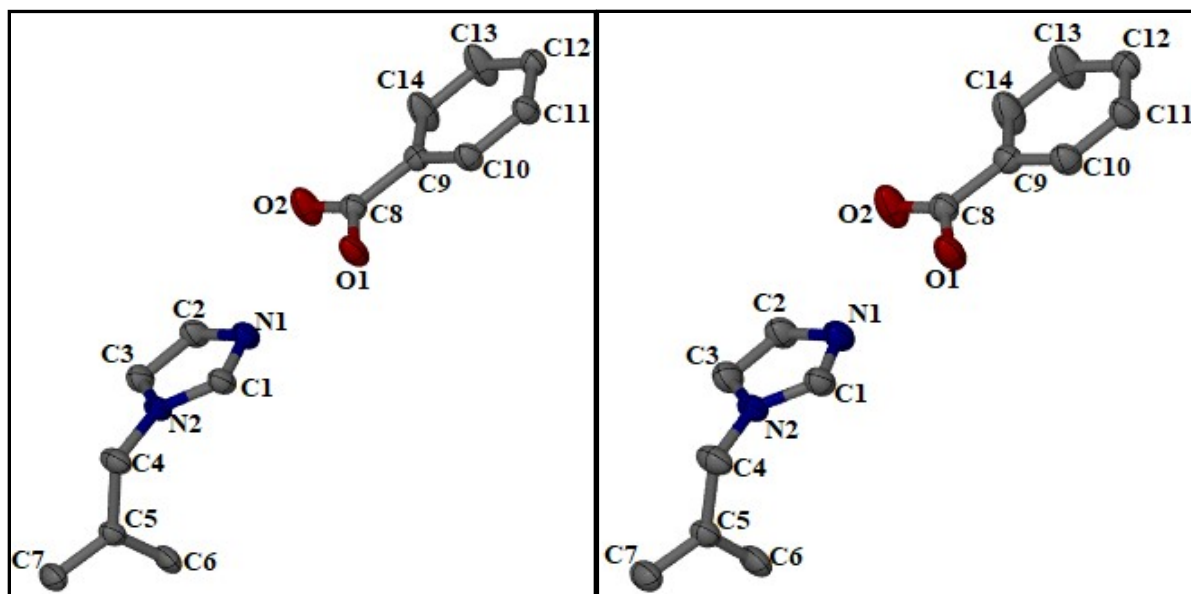

200K

250K

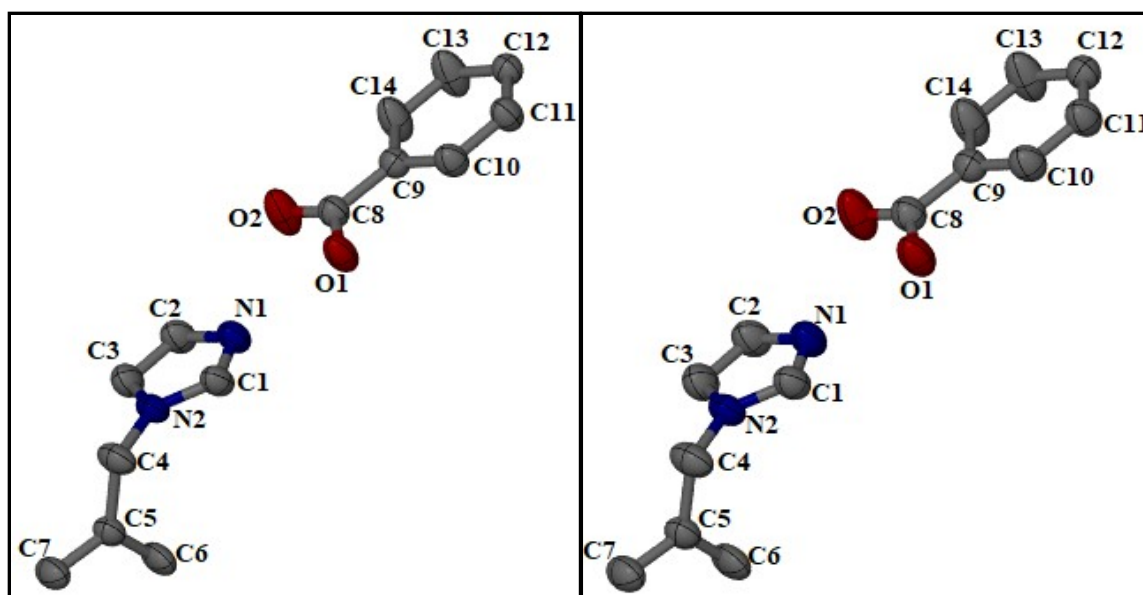

300K

350K

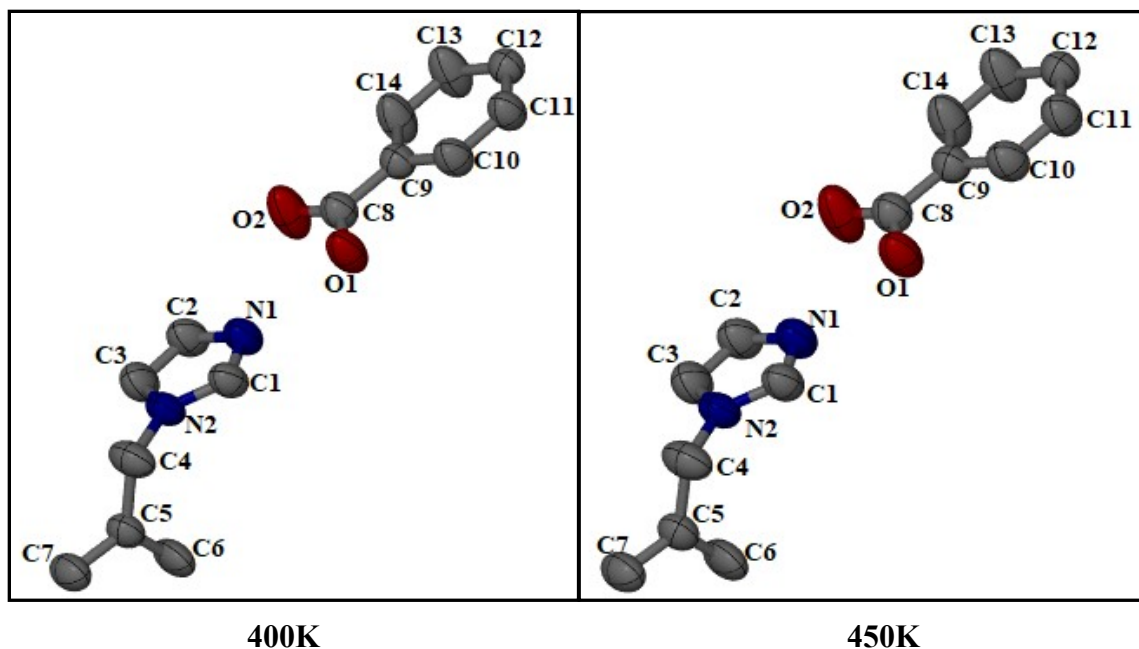

**Figure S18.** Thermal ellipsoid plot of the molecule in the asymmetric unit of the crystal structure of **BIMB-BPDCA** at different temperature. Thermal ellipsoid plots are shown in 50% probability.

- **References**

1. Z.-Z. Yang, Y. Zhao, G. Ji, H. Zhang, B. Yu, X. Gao and Z. Liu, *Green Chem.*, 2014, **16**, 3724-3728
2. SAINT; Bruker AXS Inc., Madison, Wisconsin, USA, 2013. SADABS; Bruker AXS Inc., Madison, Wisconsin, USA, 2012.
3. G. M. Sheldrick, SHELXT v 2014/5; <http://shelx.uni-ac.gwdg.de/SHELX/index.php>.
4. , G. M. Sheldrick SHELXL v 2018/3; <http://shelx.uni-ac.gwdg.de/SHELX/index.php>
5. M. J. Cliffe and A. L. Goodwin, PASCAL: a principal axis strain calculator for thermal expansion and compressibility determination. *J. Appl. Crystallogr.*, 2012, **45**, 1321-1329.
6. A. L. Spek, PLATON. *Acta Cryst.* 2009, **D65**, 148-155.
